# Supplementary material for: The 2018 Global Point Prevalence Survey of antimicrobial consumption and resistance in 47 Canadian hospitals: a cross-sectional survey
Source: PubMed Central journal article supplement — CMAJ Open. 2021 Dec 21;9(4):E1242–51. doi: 10.9778/cmajo.20200274 (PMC8695542; doi:10.9778/cmajo.20200274), 2021-12-21
Supplement: open-2020-0274-2-at.pdf [file open-2020-0274-2-at.pdf]

**Supplementary Material Table 1.** Number of Antimicrobials for Community-Acquired and Hospital-Acquired Infectious Disease Indications

| Indication                           | Adults   |        |        | Pediatric and Neonatal |        |        |
|--------------------------------------|----------|--------|--------|------------------------|--------|--------|
|                                      | Total, N | CAI, % | HAI, % | Total, N               | CAI, % | HAI, % |
| Overall                              | 4610     | 62.0   | 38.0   | 222                    | 70.3   | 29.7   |
| Central Nervous System               | 108      | 67.6   | 32.4   | 20                     | 80.0   | 20.0   |
| Eye                                  | 8        | 87.5   | 12.5   | 1                      | 100    | 0      |
| Ear, Nose, Throat                    | 142      | 47.2   | 52.8   | 15                     | 93.3   | 6.7    |
| Lung Abscess                         | 57       | 78.9   | 21.1   | 3                      | 100    | 0      |
| Upper Respiratory Tract              | 31       | 87.1   | 12.9   | 0                      | NA     | NA     |
| Acute Bronchitis or Exacerbation     | 134      | 85.1   | 14.9   | 2                      | 100    | 0      |
| Pneumonia or Lower Respiratory Tract | 1100     | 61.2   | 38.8   | 32                     | 65.6   | 34.4   |
| Tuberculosis                         | 66       | 100    | 0      | 0                      | NA     | NA     |
| Cardiovascular                       | 139      | 57.6   | 42.4   | 1                      | 0      | 100    |
| GI Tract                             | 260      | 43.1   | 56.9   | 8                      | 75.0   | 25.0   |
| Intra-Abdominal sepsis               | 516      | 65.9   | 34.1   | 15                     | 73.3   | 26.7   |
| Skin and Soft Tissue                 | 484      | 66.7   | 33.3   | 11                     | 54.5   | 45.5   |
| Bone and Joint                       | 341      | 65.7   | 34.3   | 12                     | 91.7   | 8.3    |
| Lower Urinary Tract                  | 300      | 48.7   | 51.3   | 1                      | 0      | 100    |
| Upper Urinary Tract                  | 240      | 59.6   | 40.4   | 12                     | 91.7   | 8.3    |
| Obstetric/Gynaecologic (female)      | 46       | 73.9   | 26.1   | 0                      | NA     | NA     |
| Genitourinary (male)                 | 16       | 50.0   | 50.0   | 0                      | NA     | NA     |
| BAC                                  | 143      | 56.6   | 43.4   | 13                     | 38.5   | 61.5   |
| Sepsis <sup>a</sup>                  | 109      | 42.2   | 57.8   | 48                     | 60.4   | 39.6   |
| HIV                                  | 116      | 100    | 0      | 0                      | NA     | NA     |
| FN                                   | 104      | 38.5   | 61.5   | 14                     | 71.4   | 28.6   |
| PUO/PUO-HO                           | 48       | 45.8   | 54.2   | 9                      | 88.9   | 11.1   |
| Lymphatic                            | 3        | 100    | 0      | 0                      | NA     | NA     |
| Other                                | 70       | 68.6   | 31.4   | 3                      | 33.3   | 66.7   |
| Unknown                              | 29       | 69.0   | 31.0   | 2                      | 50.0   | 50.0   |

<sup>a</sup>With no clear anatomical site

Abbreviations: CAI, community-acquired infectious disease; HAI, hospital-acquired infectious disease; GI, gastrointestinal; BAC, bacteremia with no clear anatomical site; FN, fever in neutropenic patient; PUO, pyrexia of unknown origin; PUO-HO, PUO in hematology-oncology patient; NA, not applicable
