# Supplementary material for: The 2018 Global Point Prevalence Survey of antimicrobial consumption and resistance in 47 Canadian hospitals: a cross-sectional survey
Source: PubMed Central journal article supplement — CMAJ Open. 2021 Dec 21;9(4):E1242–51. doi: 10.9778/cmajo.20200274 (PMC8695542; doi:10.9778/cmajo.20200274), 2021-12-21
Supplement: open-2020-0274-3-at.pdf [file open-2020-0274-3-at.pdf]

**Supplementary Material Table 2.** Antimicrobial Prevalence by Surgical Prophylaxis Site for Adult, Pediatric and Neonatal Wards

| <b>Adult</b>                                                                 | <b>All wards</b> | <b>AMW</b> | <b>HO-AMW</b> | <b>T-AMW</b>  | <b>P-AMW</b> | <b>ASW</b>  | <b>AICU</b> |
|------------------------------------------------------------------------------|------------------|------------|---------------|---------------|--------------|-------------|-------------|
| <b>Total number of antimicrobials prescribed for surgical prophylaxis, N</b> | 567              | 86         | 4             | 0             | 1            | 403         | 73          |
| <b>Prophylaxis site, N</b>                                                   |                  |            |               |               |              |             |             |
| General surgical prophylaxis without targeting a specific site               | 11               | 0          | 4             | 0             | 0            | 7           | 0           |
| Other                                                                        | 2                | 0          | 0             | 0             | 0            | 0           | 2           |
| Bone and Joint                                                               | 176              | 10         | 0             | 0             | 0            | 158         | 8           |
| Central Nervous System                                                       | 29               | 4          | 0             | 0             | 0            | 14          | 11          |
| Cardiovascular System                                                        | 107              | 19         | 0             | 0             | 0            | 44          | 44          |
| Ear, Nose, Throat                                                            | 31               | 3          | 0             | 0             | 0            | 26          | 2           |
| Gastrointestinal Tract                                                       | 78               | 6          | 0             | 0             | 0            | 67          | 5           |
| Obstetrics or Gynecological                                                  | 68               | 38         | 0             | 0             | 0            | 30          | 0           |
| Respiratory Tract                                                            | 7                | 0          | 0             | 0             | 1            | 6           | 0           |
| Urinary Tract                                                                | 58               | 6          | 0             | 0             | 0            | 51          | 1           |
| <b>Pediatric and Neonatal</b>                                                | <b>All wards</b> | <b>PMW</b> | <b>GNMW</b>   | <b>HO-PMW</b> | <b>PSW</b>   | <b>PICU</b> | <b>NICU</b> |
| <b>Total number of antimicrobials prescribed for surgical prophylaxis, N</b> | 11               | 3          | 0             | 0             | 5            | 0           | 3           |
| <b>Prophylaxis site, N</b>                                                   |                  |            |               |               |              |             |             |
| Bone and Joint                                                               | 2                | 0          | 0             | 0             | 2            | 0           | 0           |
| Ear, Nose, Throat                                                            | 1                | 0          | 0             | 0             | 1            | 0           | 0           |
| Gastrointestinal Tract                                                       | 8                | 3          | 0             | 0             | 2            | 0           | 3           |

Abbreviations: AMW, adult medical ward; HO-AMW, hematology-oncology-AMW, T-AMW, transplant-AMW; P-AMW, pneumology-AMW; ASW, adult surgical ward; AICU, adult intensive care unit; PMW, pediatric medical ward; GNMW, general neonatal medical ward; PSW, pediatric surgical ward; PICU, pediatric intensive care unit; NICU, neonatal intensive care unit
