# Supplementary material for: The 2018 Global Point Prevalence Survey of antimicrobial consumption and resistance in 47 Canadian hospitals: a cross-sectional survey
Source: PubMed Central journal article supplement — CMAJ Open. 2021 Dec 21;9(4):E1242–51. doi: 10.9778/cmajo.20200274 (PMC8695542; doi:10.9778/cmajo.20200274), 2021-12-21
Supplement: open-2020-0274-4-at.pdf [file open-2020-0274-4-at.pdf]

**Supplementary Material Table 3.** Antimicrobial Prevalence by Medical Prophylaxis Site for Adult, Pediatric and Neonatal Wards

| <b>Adult</b>                                                                | <b>All wards</b> | <b>AMW</b> | <b>HO-AMW</b> | <b>T-AMW</b>  | <b>P-AMW</b> | <b>ASW</b>  | <b>AICU</b> |
|-----------------------------------------------------------------------------|------------------|------------|---------------|---------------|--------------|-------------|-------------|
| <b>Total number of antimicrobials prescribed for medical prophylaxis, N</b> | 749              | 227        | 175           | 178           | 37           | 73          | 59          |
| <b>Prophylaxis site, N</b>                                                  |                  |            |               |               |              |             |             |
| Fever in a neutropenic patient                                              | 2                | 0          | 2             | 0             | 0            | 0           | 0           |
| General medical prophylaxis without targeting a specific site               | 425              | 86         | 158           | 115           | 9            | 27          | 30          |
| Medical prophylaxis for maternal risk factors                               | 6                | 6          | 0             | 0             | 0            | 0           | 0           |
| Other                                                                       | 15               | 7          | 1             | 0             | 3            | 0           | 4           |
| Bone and Joint                                                              | 16               | 9          | 0             | 1             | 0            | 6           | 0           |
| Central Nervous System                                                      | 3                | 2          | 0             | 0             | 0            | 1           | 0           |
| Cardiovascular System                                                       | 3                | 3          | 0             | 0             | 0            | 0           | 0           |
| Ear, Nose, Throat                                                           | 16               | 3          | 0             | 10            | 0            | 0           | 3           |
| Gastrointestinal Tract                                                      | 57               | 23         | 1             | 11            | 1            | 13          | 8           |
| Obstetrics or Gynecological                                                 | 7                | 3          | 0             | 0             | 0            | 4           | 0           |
| Respiratory Tract                                                           | 165              | 64         | 11            | 40            | 24           | 12          | 14          |
| Urinary Tract                                                               | 30               | 19         | 1             | 0             | 0            | 10          | 0           |
| Tuberculosis                                                                | 1                | 0          | 0             | 1             | 0            | 0           | 0           |
| Unknown                                                                     | 3                | 2          | 1             | 0             | 0            | 0           | 0           |
| <b>Pediatric and Neonatal</b>                                               | <b>All wards</b> | <b>PMW</b> | <b>GNMW</b>   | <b>HO-PMW</b> | <b>PSW</b>   | <b>PICU</b> | <b>NICU</b> |
| <b>Total number of antimicrobials prescribed for medical prophylaxis, N</b> | 76               | 7          | 2             | 24            | 4            | 9           | 30          |
| <b>Prophylaxis site, N</b>                                                  |                  |            |               |               |              |             |             |
| General medical prophylaxis without targeting a specific site               | 28               | 0          | 0             | 16            | 1            | 3           | 8           |

|                                                     |    |   |   |   |   |   |    |
|-----------------------------------------------------|----|---|---|---|---|---|----|
| Medical prophylaxis for newborn risk factors        | 14 | 0 | 2 | 0 | 0 | 0 | 12 |
| Respiratory Tract                                   | 13 | 3 | 0 | 6 | 0 | 4 | 0  |
| Urinary Tract                                       | 4  | 2 | 0 | 0 | 0 | 0 | 2  |
| PUO/PUO-HO                                          | 6  | 2 | 0 | 2 | 2 | 0 | 0  |
| Bacteremia with no clear anatomic site and no shock | 10 | 0 | 0 | 0 | 0 | 2 | 8  |
| Skin, soft tissue                                   | 1  | 0 | 0 | 0 | 1 | 0 | 0  |

Abbreviations: AMW, adult medical ward; HO-AMW, hematology-oncology-AMW, T-AMW, transplant-AMW; P-AMW, pneumology-AMW; ASW, adult surgical ward; AICU, adult intensive care unit; PMW, pediatric medical ward; GNMW, general neonatal medical ward; PSW, pediatric surgical ward; PICU, pediatric intensive care unit; NICU, neonatal intensive care unit
