# Supplementary material for: The 2018 Global Point Prevalence Survey of antimicrobial consumption and resistance in 47 Canadian hospitals: a cross-sectional survey
Source: PubMed Central journal article supplement — CMAJ Open. 2021 Dec 21;9(4):E1242–51. doi: 10.9778/cmajo.20200274 (PMC8695542; doi:10.9778/cmajo.20200274), 2021-12-21
Supplement: open-2020-0274-5-at.pdf [file open-2020-0274-5-at.pdf]

**Supplementary Material Table 4.** Antimicrobial Prevalence by Region

|                                                | <b>Total</b>   | <b>West</b>    | <b>Central</b> | <b>Atlantic</b> |
|------------------------------------------------|----------------|----------------|----------------|-----------------|
| <b>Total number of antimicrobials, N</b>       | 6525           | 2092           | 3372           | 1061            |
| <b>Antibiotics, N (%)</b>                      | 5454<br>(83.6) | 1729<br>(82.6) | 2801 (83.1)    | 924 (87.1)      |
| <b>Antifungals, N (%)</b>                      | 473<br>(7.2)   | 144 (6.9)      | 264 (7.8)      | 65 (6.1)        |
| <b>Antivirals, N (%)</b>                       | 477<br>(7.3)   | 179 (8.6)      | 250 (7.4)      | 48 (4.5)        |
| <b>Antituberculosis agents, N (%)</b>          | 47<br>(0.7)    | 26 (1.2)       | 13 (0.4)       | 8 (0.8)         |
| <b>Antimalarial agents, N (%)</b>              | 72<br>(1.1)    | 13 (0.6)       | 44 (1.3)       | 15 (1.4)        |
| <b>Other, N (%)</b>                            | 46<br>(0.7)    | 10 (0.5)       | 25 (0.7)       | 11 (1.0)        |
| <b>Antibiotics by Class, %</b>                 |                |                |                |                 |
| Penicillins with $\beta$ -lactamase inhibitors | 19.1           | 19.3           | 20.0           | 16.1            |
| Penicillins with extended spectrum             | 0.1            | 0.1            | 0.1            | 0               |
| $\beta$ -lactamase-resistant penicillins       | 1.4            | 2.1            | 0.8            | 1.7             |
| $\beta$ -lactamase-sensitive penicillins       | 4.1            | 3.5            | 4.4            | 4.1             |
| 1 <sup>st</sup> generation cephalosporins      | 13.4           | 14.6           | 12.2           | 14.7            |
| 2 <sup>nd</sup> generation cephalosporins      | 1.6            | 1.5            | 1.4            | 2.6             |
| 3 <sup>rd</sup> generation cephalosporins      | 11.1           | 13.3           | 9.5            | 12.0            |
| 4 <sup>th</sup> generation cephalosporins      | 0.1            | 0.1            | 0.2            | 0               |
| 5 <sup>th</sup> generation cephalosporins      | 0.1            | 0.2            | 0.1            | 0               |
| Carbapenems                                    | 5.0            | 4.2            | 6.0            | 3.8             |
| Fluoroquinolones                               | 10.7           | 8.9            | 11.4           | 11.8            |
| Aminoglycosides                                | 2.1            | 1.0            | 2.9            | 1.7             |
| Macrolides                                     | 4.0            | 4.0            | 3.8            | 4.3             |
| Tetracyclines                                  | 2.5            | 2.0            | 2.7            | 2.5             |
| Clindamycin                                    | 1.3            | 1.3            | 1.5            | 1.0             |
| Metronidazole                                  | 5.3            | 5.9            | 4.1            | 7.9             |
| Combinations of sulfonamides and trimethoprim  | 5.7            | 4.7            | 6.2            | 6.0             |
| Linezolid                                      | 0.4            | 0.9            | 0.1            | 0.2             |
| Vancomycin PO                                  | 2.5            | 2.0            | 2.8            | 2.4             |
| Vancomycin IV                                  | 5.8            | 6.9            | 6.0            | 3.4             |
| Nitrofurantoin                                 | 1.1            | 1.0            | 0.9            | 1.7             |
| Colistin                                       | 0.3            | 0.1            | 0.4            | 0.0             |
| Daptomycin                                     | 0.5            | 0.7            | 0.5            | 0.0             |
| Rifamycins                                     | 1.1            | 1.1            | 1.1            | 1.0             |
| Other                                          | 0.7            | 1.0            | 0.1            | 0.2             |

Appendix 5, as supplied by the authors. Appendix to: German GJ, Frenette C, Caissy J-A, et al. The 2018 Global Point Prevalence Survey of antimicrobial consumption and resistance in 47 Canadian hospitals: a cross-sectional survey. *CMAJ Open* 2021. doi: 10.9778/cmajo.20200274. Copyright © 2021 The Author(s) or their employer(s). To receive this resource in an accessible format, please contact us at [cmajgroup@cmaj.ca](mailto:cmajgroup@cmaj.ca).
