# Supplementary material for: The 2018 Global Point Prevalence Survey of antimicrobial consumption and resistance in 47 Canadian hospitals: a cross-sectional survey
Source: PubMed Central journal article supplement — CMAJ Open. 2021 Dec 21;9(4):E1242–51. doi: 10.9778/cmajo.20200274 (PMC8695542; doi:10.9778/cmajo.20200274), 2021-12-21
Supplement: open-2020-0274-6-at.pdf [file open-2020-0274-6-at.pdf]

**Supplementary Material Table 5.** Antimicrobial Prevalence by Class in Adult, Pediatric and Neonatal Wards

| <b>Adult</b>                                              | <b>All ward<br/>s</b> | <b>AMW</b>     | <b>HO-AMW</b> | <b>T-AMW</b>  | <b>P-AMW</b> | <b>ASW</b>     | <b>AICU</b> |
|-----------------------------------------------------------|-----------------------|----------------|---------------|---------------|--------------|----------------|-------------|
| <b>Total number of antimicrobials, N</b>                  | 6171                  | 2753           | 387           | 305           | 196          | 1755           | 775         |
| <b>Antibiotics, N (%)</b>                                 | 5153<br>(83.5)        | 2354<br>(85.5) | 213 (55.0)    | 137 (44.9)    | 150 (76.5)   | 1621<br>(92.4) | 678 (87.5)  |
| <b>Antifungals, N (%)</b>                                 | 442<br>(7.2)          | 144 (5.2)      | 85 (22.0)     | 78 (25.6)     | 11 (5.6)     | 65 (3.7)       | 59 (7.6)    |
| <b>Antivirals, N (%)</b>                                  | 457<br>(7.4)          | 196 (7.1)      | 86 (22.2)     | 79 (25.9)     | 15 (7.7)     | 49 (2.8)       | 32 (4.1)    |
| <b>Antituberculosis agents, N (%)</b>                     | 45<br>(0.7)           | 11 (0.4)       | 2 (0.5)       | 4 (1.3)       | 19 (0.7)     | 6 (0.3)        | 3 (0.4)     |
| <b>Antimalarial agents, N (%)</b>                         | 72<br>(1.2)           | 47 (1.7)       | 1(0.3)        | 6 (2.0)       | 1 (0.5)      | 14 (0.8)       | 3 (0.4)     |
| <b>Other, N (%)</b>                                       | 2<br>(<0.1)           | 1 (<0.1)       | 0             | 1 (0.3)       | 0            | 0              | 0           |
| <b>Antibiotics by Class, %</b>                            |                       |                |               |               |              |                |             |
| Penicillins with $\beta$ -lactamase inhibitors            | 19.7                  | 18.1           | 28.2          | 21.2          | 16.7         | 20.8           | 20.6        |
| Penicillins with extended spectrum                        | 0                     | 0              | 0             | 0             | 0            | 0              | 0           |
| $\beta$ -lactamase-resistant penicillins                  | 1.4                   | 1.9            | 0.5           | 0             | 0            | 1.2            | 1.0         |
| $\beta$ -lactamase-sensitive penicillins                  | 2.3                   | 3.5            | 2.3           | 0.7           | 2.0          | 1.2            | 0.9         |
| 1 <sup>st</sup> generation cephalosporins                 | 13.8                  | 9.8            | 2.8           | 1.5           | 2.7          | 24.2           | 10.9        |
| 2 <sup>nd</sup> generation cephalosporins                 | 1.6                   | 2.6            | 0.0           | 0.0           | 1.3          | 1.0            | 0.6         |
| 3 <sup>rd</sup> generation cephalosporins                 | 10.8                  | 13.0           | 3.3           | 4.4           | 8.0          | 8.3            | 13.3        |
| 4 <sup>th</sup> generation cephalosporins                 | 0.2                   | 0.0            | 0.5           | 0.0           | 0.7          | 0.2            | 0.1         |
| 5 <sup>th</sup> generation cephalosporins                 | 0.1                   | 0.1            | 0.0           | 0.0           | 0.0          | 0.1            | 0.4         |
| Carbapenems                                               | 5.1                   | 4.0            | 8.9           | 10.2          | 8.0          | 3.3            | 10.2        |
| Fluoroquinolones                                          | 11.1                  | 12.4           | 14.6          | 8.8           | 15.3         | 10.9           | 5.9         |
| Aminoglycosides                                           | 1.3                   | 1.1            | 0.5           | 1.5           | 4.0          | 1.5            | 1.2         |
| Macrolides                                                | 4.1                   | 5.3            | 0.9           | 3.6           | 10.0         | 1.9            | 4.9         |
| Tetracyclines                                             | 2.6                   | 4.1            | 0.0           | 0.7           | 4.7          | 1.8            | 1.2         |
| Clindamycin                                               | 1.4                   | 1.5            | 0.9           | 0.0           | 0.7          | 1.4            | 1.5         |
| Metronidazole                                             | 5.4                   | 4.0            | 3.8           | 0.7           | 2.7          | 8.8            | 4.6         |
| Combinations of sulfonamides and trimethoprim             | 5.6                   | 5.6            | 14.6          | 28.5          | 10.0         | 2.7            | 4.7         |
| Linezolid                                                 | 0.4                   | 0.4            | 0.0           | 0.0           | 1.3          | 0.4            | 0.3         |
| Vancomycin PO                                             | 2.6                   | 3.1            | 3.8           | 5.1           | 0.7          | 1.8            | 2.2         |
| Vancomycin IV                                             | 5.9                   | 4.8            | 10.8          | 8.8           | 2.7          | 4.5            | 11.4        |
| Nitrofurantoin                                            | 11                    | 1.4            | 0.9           | 0.0           | 0.0          | 1.2            | 0.4         |
| Colistin                                                  | 0.3                   | 0.1            | 0.0           | 2.9           | 2.7          | 0.1            | 0.3         |
| Daptomycin                                                | 0.5                   | 0.5            | 0.9           | 0.0           | 0.0          | 0.5            | 0.6         |
| Rifamycins                                                | 1.1                   | 0.9            | 0.0           | 0.0           | 4.0          | 1.4            | 1.0         |
| Other                                                     | 0.8                   | 0.8            | 1.4           | 1.5           | 2.0          | 0.6            | 0.4         |
| <b>Pediatric and Neonatal</b>                             | <b>All ward<br/>s</b> | <b>PMW</b>     | <b>GNMW</b>   | <b>HO-PMW</b> | <b>PSW</b>   | <b>PICU</b>    | <b>NICU</b> |
| <b>Total number of antimicrobials, N</b>                  | 354                   | 115            | 14            | 46            | 32           | 39             | 108         |
| <b>Antibiotics, N (%)</b>                                 | 301<br>(85.0)         | 106<br>(92.2)  | 14 (100)      | 30 (65.2)     | 32 (100)     | 33 (84.6)      | 86 (79.6)   |
| <b>Antifungals, N (%)</b>                                 | 31<br>(8.8)           | 2 (1.7)        | 0             | 12 (26.1)     | 0            | 5 (12.8)       | 12 (11.1)   |
| <b>Antivirals, N (%)</b>                                  | 20<br>(5.6)           | 6(5.2)         | 0             | 3 (6.5)       | 0            | 1 (2.6)        | 10(9.3)     |
| <b>Antituberculosis agents, N (%)</b>                     | 2 (0.6)               | 1 (0.9)        | 0             | 1 (2.2)       | 0            | 0              | 0           |
| <b>Antibiotics by Class, %</b>                            |                       |                |               |               |              |                |             |
| Penicillins with $\beta$ -lactamase inhibitors            | 8.3                   | 8.5            | 0.0           | 20.0          | 9.4          | 18.2           | 1.2         |
| <b>Penicillins with extended spectrum</b>                 | <b>0</b>              | <b>0</b>       | <b>0</b>      | <b>0</b>      | <b>0</b>     | <b>0</b>       | <b>0</b>    |
| $\beta$ -lactamase-resistant penicillins                  | 1.7                   | 0.0            | 0.0           | 0.0           | 0.0          | 0.0            | 5.8         |
| <b><math>\beta</math>-lactamase-sensitive penicillins</b> | <b>20.3</b>           | <b>17.0</b>    | <b>50.0</b>   | <b>0.0</b>    | <b>12.5</b>  | <b>12.1</b>    | <b>32.6</b> |
| 1 <sup>st</sup> generation cephalosporins                 | 7.0                   | 11.3           | 0.0           | 0.0           | 18.8         | 0.0            | 3.5         |

Appendix 6, as supplied by the authors. Appendix to: German GJ, Frenette C, Caissy J-A, et al. The 2018 Global Point Prevalence Survey of antimicrobial consumption and resistance in 47 Canadian hospitals: a cross-sectional survey. *CMAJ Open* 2021. doi: 10.9778/cmajo.20200274. Copyright © 2021 The Author(s) or their employer(s). To receive this resource in an accessible format, please contact us at [cmajgroup@cmaj.ca](mailto:cmajgroup@cmaj.ca).

|                                               |      |      |      |      |      |      |      |
|-----------------------------------------------|------|------|------|------|------|------|------|
| 2 <sup>nd</sup> generation cephalosporins     | 1.3  | 0.9  | 0.0  | 0.0  | 0.0  | 0.0  | 3.5  |
| 3 <sup>rd</sup> generation cephalosporins     | 16.9 | 29.2 | 0.0  | 6.7  | 15.6 | 18.2 | 8.1  |
| Carbapenems                                   | 4.0  | 1.9  | 0.0  | 3.3  | 6.3  | 9.1  | 4.7  |
| Fluoroquinolones                              | 2.7  | 2.8  | 0.0  | 6.7  | 6.3  | 3.0  | 0.0  |
| Aminoglycosides                               | 15.9 | 9.4  | 50.0 | 3.3  | 6.3  | 6.1  | 30.2 |
| Macrolides                                    | 2.0  | 2.8  | 0.0  | 3.3  | 0.0  | 6.1  | 0.0  |
| Tetracyclines                                 | 0.3  | 0.9  | 0.0  | 0.0  | 0.0  | 0.0  | 0.0  |
| Clindamycin                                   | 0.7  | 1.9  | 0.0  | 0.0  | 0.0  | 0.0  | 0.0  |
| Metronidazole                                 | 3.7  | 2.8  | 0.0  | 0.0  | 15.6 | 3.0  | 2.3  |
| Combinations of sulfonamides and trimethoprim | 7.0  | 2.8  | 0.0  | 36.7 | 6.3  | 15.2 | 0.0  |
| Linezolid                                     | 2    | 1    | 0    | 1    | 0    | 0    | 0    |
| Vancomycin PO                                 | 1    | 0    | 0    | 1    | 0    | 3    |      |
| Vancomycin IV                                 | 16   | 4    | 0    | 1    | 1    | 0    | 7    |
| Nitrofurantoin                                | 1    | 1    | 0    | 0    | 0    | 0    | 0    |
| Rifampicin                                    | 1    | 0    | 0    | 1    | 0    | 0    | 0    |
| Other                                         | 4    | 2    | 0    | 2    | 0    | 0    | 0    |

Abbreviations: AMW, adult medical ward; HO-AMW, hematology-oncology-AMW, T-AMW, transplant-AMW; P-AMW, pneumology-AMW; ASW, adult surgical ward; AICU, adult intensive care unit; PMW, pediatric medical ward; GNMW, general neonatal medical ward; PSW, pediatric surgical ward; PICU, pediatric intensive care unit; NICU, neonatal intensive care unit
