# Supplementary material for: The 2018 Global Point Prevalence Survey of antimicrobial consumption and resistance in 47 Canadian hospitals: a cross-sectional survey
Source: PubMed Central journal article supplement — CMAJ Open. 2021 Dec 21;9(4):E1242–51. doi: 10.9778/cmajo.20200274 (PMC8695542; doi:10.9778/cmajo.20200274), 2021-12-21
Supplement: open-2020-0274-cherries-checklist.pdf [file open-2020-0274-cherries-checklist.pdf]

| Item category         | Checklist Item                          | Manuscript page                  | Section                           |
|-----------------------|-----------------------------------------|----------------------------------|-----------------------------------|
| Design                | Describe survey design                  | 4                                | Method - Objective and Design     |
| IRB                   | IRB approval                            | 6                                | Method - Setting and Participants |
|                       | Informed consent                        | Not applicable                   | Not applicable                    |
|                       | Data protection                         | Described in referenced protocol | Method - Objective and Design     |
| Recruitment process   | Open survey versus closed survey        | 5                                | Method - Setting and Participants |
|                       | Contact mode                            | 5                                | Method - Setting and Participants |
|                       | Advertising the survey                  | Not applicable                   | Not applicable                    |
| Survey administration | Web/E-mail                              | 5                                | Method - Setting and Participants |
|                       | Context                                 | 5                                | Method - Objective and Design     |
|                       | Mandatory/voluntary                     | 6                                | Method - Objective and Design     |
|                       | Incentive                               | Not applicable                   | Not applicable                    |
|                       | Time/Date                               | 5                                | Method - Setting and Participants |
|                       | Randomization of items or questionnaire | Described in referenced protocol | Method - Objective and Design     |
|                       | Adaptive questioning                    | Described in referenced protocol | Method - Objective and Design     |
|                       | Number of items                         | Described in referenced protocol | Method - Objective and Design     |
|                       | Number of screens                       | Described in referenced protocol | Method - Objective and Design     |
|                       | Completeness check                      | Described in referenced protocol | Method - Objective and Design     |
|                       | Review step                             | Described in referenced protocol | Method - Objective and Design     |
| Response rates        | Unique site visitor                     | 6                                | Method - Data collection          |

|                             |                                                    |                                  |                                   |
|-----------------------------|----------------------------------------------------|----------------------------------|-----------------------------------|
|                             | View rate                                          | Not applicable                   | Not applicable                    |
|                             | Participation rate                                 | 7                                | Results                           |
|                             | Completion rate                                    | Same as participation rate       | Results                           |
| Preventing multiple entries | Cookie used                                        | Described in referenced protocol | Method - Objective and Design     |
|                             | IP check                                           | Described in referenced protocol | Method - Objective and Design     |
|                             | Log file analysis                                  | Described in referenced protocol | Method - Objective and Design     |
|                             | Registration                                       | Described in referenced protocol | Method - Objective and Design     |
| Analysis                    | Handling of incomplete questionnaires              | Not applicable                   | Not applicable                    |
|                             | Questionnaire submitted with an atypical timestamp | 5                                | Method - Setting and Participants |
|                             | Statistical correction                             | Not applicable                   | Not applicable                    |
